# Supplementary material for: A composite cathode membrane with CoFe2O4–rGO/PVDF on carbon fiber cloth: synthesis and performance in a photocatalysis-assisted MFC-MBR system
Source: Royal Society of Chemistry journal article supplement (doi:10.1039/c6en00454g), 2016-11-22
Supplement: c6en00454g1.pdf [file c6en00454g1.pdf]

Fig. S1 The ORR activities of  $M\text{Fe}_2\text{O}_4$  catalysts, bubbled with  $\text{N}_2$ ,  $\text{O}_2$  and  $\text{O}_2$  with irradiation.

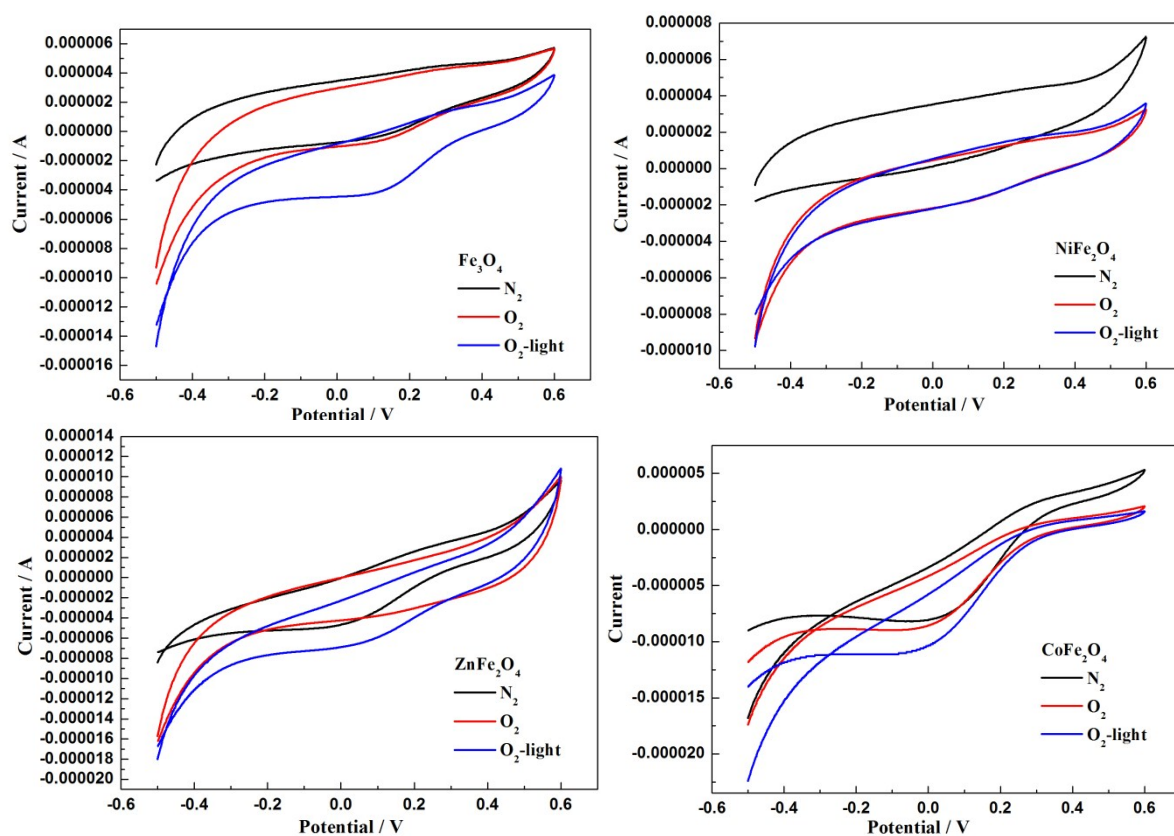

Fig.S2 The ORR activities of CoFe<sub>2</sub>O<sub>4</sub>- PCM (a) and CoFe<sub>2</sub>O<sub>4</sub>-rGO- PCM (b) in 0.2 M Na<sub>2</sub>SO<sub>4</sub> solution bubbled with N<sub>2</sub> or O<sub>2</sub>.

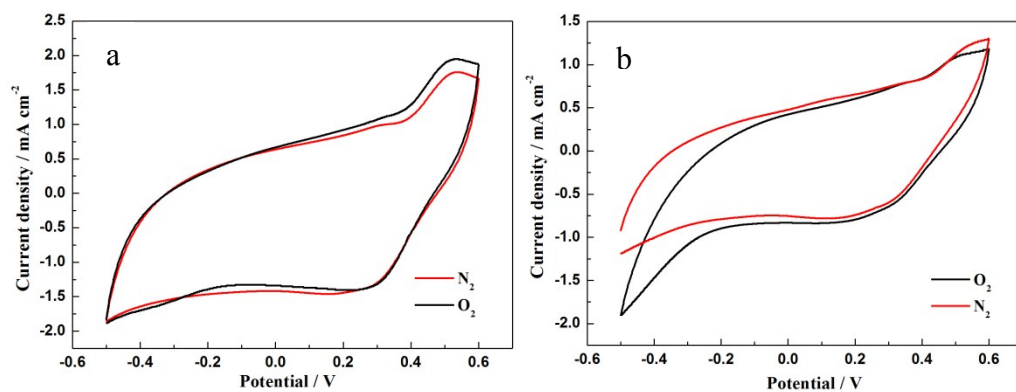

Tab. S1 The inner resistance of photocatalysis-assisted MFC/MBR system using CoFe<sub>2</sub>O<sub>4</sub>-PCM and CoFe<sub>2</sub>O<sub>4</sub>-rGO- PCM with or without irradiation.

| Inner resistance    | CoFe <sub>2</sub> O <sub>4</sub> -PCM | CoFe <sub>2</sub> O <sub>4</sub> -rGO- PCM |
|---------------------|---------------------------------------|--------------------------------------------|
| Within irradiation  | 477 $\Omega$                          | 382 $\Omega$                               |
| Without irradiation | 493 $\Omega$                          | 382 $\Omega$                               |

The Scherrer's formula is:

$$D = k \lambda / (\beta \cos\theta)$$

Where k is constant, 1;  $\lambda$  is the wavelength of X-ray;  $\beta$  is peak width at half height;

and  $\theta$  is diffraction angle.
